# Supplementary material
Source: publisher figshare collection journal article supplement (https://gsajournals.figshare.com/ndownloader/files/14566277)
Supplement: Supplementary file 1 [file 14566277]

## Sheet: DNA oligomers
Name	Sequence
JEBPN-Biotin2	5’-Biosg/GAAGGGCAATCAGCTGTTGC
JEBPN-DNA-linker	5’Phos/TCGTATGCCGTCTTCTGCTTGACTCAGTAGTTGTGCGATGGATTGATG/ddC-3’
JEBPN-SA-II	5’-CAAGCAGAAGACGGCATACGA-3’
JEBPN-index-SA-I	5'-AATGATACGGCGACCACCGAGATCT GATCGGAAGAGCACACGTCTGAACTCCAGTCAC TCAAGT ACGCTCGTCCGATCT CGTCCGCAATGTGTTATTAAG-3'
JEBPN-SP3	ACGCTCGTCCGATCT CGTCCGCAATGTGTTATTAAG
Dig-anti-U6	5’-/5DigN/TCCTCTCTGCTCGAGTTTGTC-3’
18S rRNA qPCR forward	GTCCAGACATAGTGAGGATTGACAG
18S rRNA qPCR reverse	GACAGTCCCTCTAAGAAGTCATACG

## Sheet: Strains
Name	Background	Genotype (ID)	Genotype (gene name)	Origin
CM1343	CM018	CNAG_03196::CNAG_02711:NEOR	ura5::HAR1:NEOR	This study
CM1896	Kn99a	CNAG_03196::CNAG_02711:NEOR	ura5::HAR1:NEOR	This study
CM1898	CM1896	CNAG_04609::NATR	ago1::NATR	This study
CM1899	CM1896	CNAG_04609::NATR	ago1::NATR	This study
CM1900	CM1896	CNAG_04791::NATR	rde5::NATR	This study
CM1901	CM1896	CNAG_04791::NATR	rde5::NATR	This study
CM1902	CM1896	CNAG_01157::NATR	rde4::NATR	This study
CM1903	CM1896	CNAG_01157::NATR	rde4::NATR	This study
CM1904	CM1896	CNAG_03466::NATR	rdp1::NATR	This study
CM1905	CM1896	CNAG_03466::NATR	rdp1::NATR	This study
CM1906	CM1896	CNAG_06080::NATR	sac1::NATR	This study
CM1907	CM1896	CNAG_06080::NATR	sac1::NATR	This study
CM1908	CM1896	CNAG_06643::NATR	rde3::NATR	This study
CM1909	CM1896	CNAG_06643::NATR	rde3::NATR	This study
CM1759	CM1343	CNAG_01848::NATR	rde1::NATR	This study
CM1760	CM1343	CNAG_01848::NATR	rde1::NATR	This study
CM1764	CM1343	CNAG_04954::NATR	rde2::NATR	This study
CM1765	CM1343	CNAG_04954::NATR	rde2::NATR	This study
CK1458	Kn99alpha	CNAG_04609::NATR	ago1::NATR	Madhani lab knockout collection
CK4680	Kn99alpha	CNAG_03466::NATR	rdp1::NATR	Madhani lab knockout collection
CK3861	Kn99alpha	CNAG_01848::NATR	rde1::NATR	Madhani lab knockout collection
CK5443	Kn99alpha	CNAG_04954::NATR	rde2::NATR	Madhani lab knockout collection
CK6327	Kn99alpha	CNAG_06643::NATR	rde3::NATR	Madhani lab knockout collection
CK3501	Kn99alpha	CNAG_01157::NATR	rde4::NATR	Madhani lab knockout collection
CK1821	Kn99alpha	CNAG_04791::NATR	rde5::NATR	Madhani lab knockout collection
CK6644	Kn99alpha	CNAG_07553::NATR	ezh2::NATR	Madhani lab knockout collection
CK4325	Kn99alpha	CNAG_02773::NATR	rrp6::NATR	Madhani lab knockout collection
CM1926	Kn99alpha	CNAG_05404_Cterm∆::HYG	clr4_Cterm∆::HYG	Dr. Sandra Catania
CM1927	CM018	CNAG_01848-CBP-2xFLAG:NATR	RDE1-CBP-2xFLAG:NATR	This study
CM1928	CM018	CNAG_01848-CBP-2xFLAG:NATR	RDE1-CBP-2xFLAG:NATR	This study
CM1690	CM018	CNAG_04954-CBP-2xFLAG:NEOR	RDE2-CBP-2xFLAG:NEOR	This study
CM1691	CM018	CNAG_04954-CBP-2xFLAG:NEOR	RDE2-CBP-2xFLAG:NEOR	This study
CM1933	Kn99alpha	CNAG_06643-CBP-2xFLAG:NEOR	RDE3-CBP-2xFLAG:NEOR	This study
CM1934	Kn99alpha	CNAG_06643-CBP-2xFLAG:NEOR	RDE3-CBP-2xFLAG:NEOR	This study
CM1929	Kn99alpha	CNAG_01157-CBP-2xFLAG:NEOR	RDE4-CBP-2xFLAG:NEOR	This study
CM1930	Kn99alpha	CNAG_01157-CBP-2xFLAG:NEOR	RDE4-CBP-2xFLAG:NEOR	This study
CM1931	Kn99alpha	CNAG_04791-CBP-2xFLAG:NEOR	RDE5-CBP-2xFLAG:NEOR	This study
CM1932	Kn99alpha	CNAG_04791-CBP-2xFLAG:NEOR	RDE5-CBP-2xFLAG:NEOR	This study
CM1726	PC245	CNAG_06626::CNAG_06626-ts5:NEOR	PRP43::prp43-ts5:NEOR	This study
CM1727	PC245	CNAG_06626::CNAG_06626-ts5:NEOR	PRP43::prp43-ts5:NEOR	This study
CM1724	CM018	CNAG_06626::CNAG_06626-ts5-CBP-2xFLAG:NEOR	PRP43::prp43-ts5-CBP-2xFLAG:NEOR	This study
CM1725	CM018	CNAG_06626::CNAG_06626-ts5-CBP-2xFLAG:NEOR	PRP43::prp43-ts5-CBP-2xFLAG:NEOR	This study
